# Supplementary material
Source: publisher site journal article supplement (https://www.spandidos-publications.com/6154/downloadSupplementary)
Supplement: Supplementary file 1 [file downloadSupplementary]

## Sheet: Genes and SNP
Table SIII. List of genes and SNP in 8q24 cytoband.*
SNP	Chromosome (GRCh38)	Cytoband	Variant type	Alleles	Symbol	Risk	Gene Varsome	Gene ID	Gene location in Chr8 (GRCh38)	SNP-Pubmed	SNPedia	Varsome (germline)	Varsome (somatic)
rs16901979	8:127112671	8q24.21	SNV	C>A	PCAT1	1.5x increased risk for prostate cancer	PCAT1	100750225	127013154-127021014	https://www.ncbi.nlm.nih.gov/snp/?term=rs16901979	https://www.snpedia.com/index.php/Rs16901979	https://varsome.com/variant/hg38/rs16901979?annotation-mode=germline	https://varsome.com/variant/hg38/rs16901979?annotation-mode=somatic
rs16901946	8:127088680	8q24.21	SNV	A>G	PRNCR1	Association between polymorphisms in PRNCR1 and risk of colorectal cancer in the Saudi population	PCAT1 CASC19 PRNCR1	101867536	127079874-127092595	https://www.ncbi.nlm.nih.gov/snp/?term=rs16901946	https://www.snpedia.com/index.php/Rs16901946	https://varsome.com/variant/hg38/rs16901946?annotation-mode=germline	https://varsome.com/variant/hg38/rs16901946?annotation-mode=somatic
rs1562430	8:127375606	8q24.21	SNV	T>C,G	CASC8, CASC21	Long non-coding RNA polymorphisms on 8q24 are associated with the prognosis of gastric cancer in a Chinese population.	CASC8 PCAT1 POU5F1B CASC21	727677, 103021164	127289676-127482139, 103021164	https://www.ncbi.nlm.nih.gov/snp/?term=rs1562430	https://www.snpedia.com/index.php/Rs1562430	https://varsome.com/variant/hg38/rs1562430?annotation-mode=germline	https://varsome.com/variant/hg38/rs1562430?annotation-mode=somatic
rs13252298	8:127082911	8q24.21	SNV	A>G	PRNCR1, PCAT2	Association between polymorphisms in long non-coding RNA PRNCR1 in 8q24 and risk of gastric cancer	PCAT1 CASC19 PRNCR1	101867536, 103164619	127079874-127092595, 127072694-127082221	https://www.ncbi.nlm.nih.gov/snp/?term=rs13252298	https://www.snpedia.com/index.php/Rs13252298	https://varsome.com/variant/hg38/rs13252298?annotation-mode=germline	https://varsome.com/variant/hg38/rs13252298?annotation-mode=somatic
rs12682421	8:127090906	8q24.21	SNV	A>G	PRNCR1	Long non-coding RNA polymorphisms on 8q24 are associated with the prognosis of gastric cancer in a Chinese population.	PCAT1 CASC19 PRNCR1	101867536	127079874-127092595	https://www.ncbi.nlm.nih.gov/snp/?term=rs12682421	https://www.snpedia.com/index.php/Rs12682421	https://varsome.com/variant/hg38/rs12682421?annotation-mode=germline	https://varsome.com/variant/hg38/rs12682421?annotation-mode=somatic
rs10808555	8:127397266	8q24.21	SNV	G>A,C,T	CASC8	Risk of eighteen genome-wide association study-identified genetic variants for colorectal cancer and colorectal adenoma in Han Chinese.	CASC8 PCAT1 POU5F1B	727677	127289676-127482139	https://www.ncbi.nlm.nih.gov/snp/?term=rs10808555	https://www.snpedia.com/index.php/Rs10808555	https://varsome.com/variant/hg38/rs10808555?annotation-mode=germline	https://varsome.com/variant/hg38/rs10808555?annotation-mode=somatic
rs10505477	8:127395198	8q24.21	SNV	A>C,G,T	CASC8	Possible association between a genetic polymorphism at 8q24 and risk of upper gastrointestinal cancer	CASC8 PCAT1 POU5F1B	727677	127289676-127482139	https://www.ncbi.nlm.nih.gov/snp/?term=rs10505477	https://www.snpedia.com/index.php/Rs10505477	https://varsome.com/variant/hg38/rs10505477?annotation-mode=germline	https://varsome.com/variant/hg38/rs10505477?annotation-mode=somatic
rs10087719	8:127216618	8q24.21	SNV	A>G	CCAT1	Long non-coding RNA polymorphisms on 8q24 are associated with the prognosis of gastric cancer in a Chinese population.	PCAT1 CASC19 CCAT1	100507056	127207382-127219268	https://www.ncbi.nlm.nih.gov/snp/?term=rs10087719	https://www.snpedia.com/index.php/Rs10087719	https://varsome.com/variant/hg38/rs10087719?annotation-mode=germline	https://varsome.com/variant/hg38/rs10087719?annotation-mode=somatic
rs9297976	8:142670817	8q24.3	SNV	T>C,G	PSCA	Genetic Variation in PSCA and Risk of Gastric Advanced Preneoplastic Lesions and Cancer in Relation to Helicobacter pylori Infection	PSCA JRK	8000	142670297-142682725	https://www.ncbi.nlm.nih.gov/snp/?term=rs9297976	https://www.snpedia.com/index.php/Rs9297976	https://varsome.com/variant/hg38/rs9297976?annotation-mode=germline	https://varsome.com/variant/hg38/rs9297976?annotation-mode=somatic
rs7816475	8:127213195	8q24.21	SNV	G>A	CCAT1	Long non-coding RNA polymorphisms on 8q24 are associated with the prognosis of gastric cancer in a Chinese population.	PCAT1 CASC19 CCAT1	100507056	127207382-127219268	https://www.ncbi.nlm.nih.gov/snp/?term=rs7816475	https://www.snpedia.com/index.php/Rs7816475	https://varsome.com/variant/hg38/rs7816475?annotation-mode=germline	https://varsome.com/variant/hg38/rs7816475?annotation-mode=somatic
rs7008482	8:125255388	8q24.13	SNV	T>G	NSMCE2	The risk of urinary bladder cancer, novel associations of single nucleotide polymorphisms with colorectal cancer, risk of prostate cancer	NSMCE2	286053	125091860-125367120	https://www.ncbi.nlm.nih.gov/snp/?term=rs7008482	https://www.snpedia.com/index.php/Rs7008482	https://varsome.com/variant/hg38/rs7008482?annotation-mode=germline	https://varsome.com/variant/hg38/rs7008482?annotation-mode=somatic
rs7007694	8:127086921	8q24.21	SNV	C>G,T	PRNCR1	Association between polymorphisms in long non-coding RNA PRNCR1 in 8q24 and risk of gastric cancer	PCAT1 CASC19 PRNCR1	101867536	127079874-127092595	https://www.ncbi.nlm.nih.gov/snp/?term=rs7007694	https://www.snpedia.com/index.php/Rs7007694	https://varsome.com/variant/hg38/rs7007694?annotation-mode=germline	https://varsome.com/variant/hg38/rs7007694?annotation-mode=somatic
rs6983267	8:127401060	8q24.21	SNV	G>T	CASC8, CCAT2	1.6x increased risk for prostate cancer; also other cancers	CCAT2 CASC8 PCAT1 POU5F1B	727677, 101805488	127289676-127482139, 127400399-127402150	https://www.ncbi.nlm.nih.gov/snp/?term=rs6983267	https://www.snpedia.com/index.php/Rs6983267	https://varsome.com/variant/hg38/rs6983267?annotation-mode=germline	https://varsome.com/variant/hg38/rs6983267?annotation-mode=somatic
rs4871789	8:127415816	8q24.21	SNV	A>G,T	POU5F1B, CASC8	Long non-coding RNA polymorphisms on 8q24 are associated with the prognosis of gastric cancer in a Chinese population.	POU5F1B CASC8 PCAT1	5462, 727677	127413447-127417224, 127289676-127482139	https://www.ncbi.nlm.nih.gov/snp/?term=rs4871789	https://www.snpedia.com/index.php/Rs4871789	https://varsome.com/variant/hg38/rs4871789?annotation-mode=germline	https://varsome.com/variant/hg38/rs4871789?annotation-mode=somatic
rs4733616	8:127649850	8q24.21	SNV	C>A,T	No data	Association of common variants on chromosome 8q24 with gastric cancer in Venezuelan patients	NA	NA	NA	https://www.ncbi.nlm.nih.gov/snp/?term=rs4733616	https://www.snpedia.com/index.php/Rs4733616	https://varsome.com/variant/hg38/rs4733616?annotation-mode=germline	https://varsome.com/variant/hg38/rs4733616?annotation-mode=somatic
rs2978980	8:142676290	8q24.3	SNV	T>A,C,G	PSCA	NA	PSCA JRK	8000	142670297-142682725	https://www.ncbi.nlm.nih.gov/snp/?term=rs2978980		https://varsome.com/variant/hg38/rs2978980?annotation-mode=germline	https://varsome.com/variant/hg38/rs2978980?annotation-mode=somatic
rs2976392	8:142681514	8q24.3	SNV	G>A,T	PSCA	Genetic variation of PSCA gene is associated with the risk of both diffuse- and intestinal-gastric cancer in a Chinese population	PSCA JRK	8000	142670297-142682725	https://www.ncbi.nlm.nih.gov/snp/?term=rs2976392	https://www.snpedia.com/index.php/Rs2976392	https://varsome.com/variant/hg38/rs2976392?annotation-mode=germline	https://varsome.com/variant/hg38/rs2976392?annotation-mode=somatic
rs2585178	8:142693706	8q24.3	SNV	G>A	NA	NA	NA	NA	NA	https://www.ncbi.nlm.nih.gov/snp/?term=rs2585178	NA	https://varsome.com/variant/hg38/rs2585178?annotation-mode=germline	https://varsome.com/variant/hg38/rs2585178?annotation-mode=somatic
rs2294008	8:142680513	8q24.3	SNV	C>T	PSCA	Genetic variation of PSCA gene is associated with the risk of both diffuse- and intestinal-gastric cancer in a Chinese population	PSCA JRK	8000	142670297-142682725	https://www.ncbi.nlm.nih.gov/snp/?term=rs2294008	https://www.snpedia.com/index.php/Rs2294008	https://varsome.com/variant/hg38/rs2294008?annotation-mode=germline	https://varsome.com/variant/hg38/rs2294008?annotation-mode=somatic
rs1562430	8:127375606	8q24.21	SNV	T>C,G	CASC8, CASC21	Long non-coding RNA polymorphisms on 8q24 are associated with the prognosis of gastric cancer in a Chinese population.	CASC8 PCAT1 POU5F1B CASC21	727677, 103021164	127289676-127482139, 103021164	https://www.ncbi.nlm.nih.gov/snp/?term=rs1562430	https://www.snpedia.com/index.php/Rs1562430	https://varsome.com/variant/hg38/rs1562430?annotation-mode=germline	https://varsome.com/variant/hg38/rs1562430?annotation-mode=somatic
rs1456315	8:127091692	8q24.21	SNV	T>A,C	PRNCR1	Association between polymorphisms in long non-coding RNA PRNCR1 in 8q24 and risk of gastric cancer	PCAT1 CASC19 PRNCR1	101867536	127079874-127092595	https://www.ncbi.nlm.nih.gov/snp/?term=rs1456315	https://www.snpedia.com/index.php/Rs1456315	https://varsome.com/variant/hg38/rs1456315?annotation-mode=germline	https://varsome.com/variant/hg38/rs1456315?annotation-mode=somatic
rs1447295	8:127472793	8q24.21	SNV	A>C,G,T	CASC8	1.7x increased risk of prostate cancer. Possible association between a genetic polymorphism at 8q24 and risk of upper gastrointestinal cancer	CASC8	727677	127289676-127482139	https://www.ncbi.nlm.nih.gov/snp/?term=rs1447295	https://www.snpedia.com/index.php/Rs1447295	https://varsome.com/variant/hg38/rs1447295?annotation-mode=germline	https://varsome.com/variant/hg38/rs1447295?annotation-mode=somatic
rs1026411	8:127014165	8q24.21	SNV	G>A,C	PCAT, LOC105375751	Long non-coding RNA polymorphisms on 8q24 are associated with the prognosis of gastric cancer in a Chinese population.	PCAT1	100750225, 105375751	127013154-127021014, 126556544-127064904	https://www.ncbi.nlm.nih.gov/snp/?term=rs1026411	https://www.snpedia.com/index.php/Rs1026411	https://varsome.com/variant/hg38/rs1026411?annotation-mode=germline	https://varsome.com/variant/hg38/rs1026411?annotation-mode=somatic
*NA, Not available
